# Supplementary material for: Experimental sand burial affects seedling survivorship, morphological traits and biomass allocation of Ulmus pumila var. sabulosa in Horqin Sandy Land
Source: Copernicus journal article supplement (doi:10.5194/se-2016-55), 2016-03-31
Supplement: Supplementary file [file se-2016-55-AC1-supplement.pdf]

1  
2  
3  
4  
5 **Experimental sand burial affects seedling survivorship, morphological traits and**  
6 **biomass allocation of *Ulmus pumila* var. *sabotusa* in Horqin Sandy Land, China**

7  
8 Jiao Tang<sup>1,2</sup>, Carlos Alberto Busso<sup>3</sup>, Deming Jiang<sup>1\*</sup>, Ala Musa<sup>1</sup>, Dafu Wu<sup>4</sup>, Yongcui Wang<sup>1</sup>, Chunping Miao<sup>1,2</sup>  
9  
10  
11

12 <sup>1</sup>Institute of Applied Ecology, Chinese Academy of Sciences, Shenyang, 110016, China;

13 <sup>2</sup> University of Chinese Academy of Sciences, Beijing, 100048, China;

14 <sup>3</sup>Departamento de Agronomía-CERZOS (CONICET: Consejo Nacional de Investigaciones Científicas y Tecnológicas de la  
15 República Argentina), Universidad Nacional del Sur, San Andrés 800, 8000 Bahía Blanca, Argentina;

16 <sup>4</sup>Department of Resource and Environment, Henan Institute of Science and Technology, Xinxiang, 453003, China  
17  
18

19  
20 **Correspondence to:** Deming Jiang (jiangdeming2016@163.com)  
21

22 **Abstract** As a native tree species, *Ulmus pumila* var. *sabotusa* (sandy elm) is widely distributed in Horqin Sandy Land,  
23 China. However, seedlings of this species have to withstand various depths of sand burial after emergence because of  
24 increasing soil degradation, which is mainly caused by overgrazing and climate change. An experiment was conducted to  
25 evaluate the changes in its survivorship, morphological traits and biomass allocation when seedlings buried at different  
26 burial depths: unburied, controls and seedlings buried vertically up to 33, 67, 100 or 133% of their initial mean seedling  
27 height. The results showed that partial sand burial treatments (i.e., less than 67% burial) did not reduce seedling survivorship,  
28 which still reached 100%. However, seedling mortality increased when sand burial was equal to or greater than 100%. In  
29 comparison with the control treatment, seedling height and stem diameter increased at least by 6 and 14% with partial burial,  
30 respectively. In the meantime, seedling taproot length, total biomass, and relative mass growth rates at least enhanced by 10%,  
31 15.6%, and 27.6%, respectively, with the partial sand burial treatment. Furthermore, sand burial decreased total leaf area and  
32 changed biomass allocation in seedlings, partitioning more biomass to aboveground organs (e.g., leaves and stems) and less  
33 to belowground parts (roots). Complete sand burial after seedling emergence inhibited its re-emergence and growth, even  
34 leading to its death. Our findings indicated that seedlings of sandy elm had some resistance to partial sand burial and were

删除的内容: u

删除的内容: o

带格式的: 字体: 非倾斜

删除的内容: r

删除的内容: e

删除的内容: t

删除的内容: s

删除的内容:

带格式的: 字体: (中文) 宋体, 非加粗, 不对齐到网格

带格式的: 字体: 非倾斜

删除的内容: the

删除的内容: with

删除的内容: (

删除的内容: ,

删除的内容: )

删除的内容: influence

删除的内容: as

删除的内容:

删除的内容: S

删除的内容: to

删除的内容:

删除的内容: in comparison with control treatment

删除的内容: Whilst s

删除的内容: on

删除的内容: transferring

删除的内容: rather

删除的内容: a certain

60 ~~adapted~~ to sandy environments ~~from an evolutionary perspective~~. The negative effects of ~~excessive sand burial~~ after seedling  
61 emergence ~~might~~ help to understand failures in recruitment of sparse elm ~~in the~~ study region.

62  
63 **Keywords:** sand ~~burial~~, seedling, sandy elm, morphological, biomass allocation, Horqin ~~Sandy L~~and

## 64 **Introduction**

65  
66 Horqin Sandy Land, shaped in the middle the Pleistocene period, is located in the southeast of the Mongolia Plateau, China  
67 (Qiu, 1989). Because of climatic changes (rainfall distribution and global warming) and excessive human disturbances (i.e.,  
68 over-utilization of renewable natural resources), ~~vegetation degradation~~ and land desertification have become more obvious  
69 in the past 50 years (Cao et al., 2008; Jiang et al., 2003; Zhang et al., 2004). Sand moves fast in the horizontal or vertical  
70 space because of the effects of strong winds during spring and summer, leading to different burial depths, which might range  
71 from 0.5cm to 56.0cm (Liu et al., 2014).

72 Soil genesis is the pivotal process that determines the evolution of ~~the soil system~~, and offers ~~services~~ and resources to  
73 mankind (Berendse et al., 2015; Niu et al., 2015). Simultaneously, ~~disturbances (such as land-use intensification and~~  
74 ~~overgrazing)~~ have a profound impact on ~~the soil genesis process because of the increasing population and consumption~~,  
75 (Brevik et al., 2015; Verheijen et al., 2009; Wang et al., 2016). ~~Excessive human interferences~~ change ~~soil hydrological~~,  
76 geochemical and biological cycles, inducing ~~serious land degradation such as acidification, salinization and desertification~~  
77 (Bellamy et al., 2005; Foley et al., 2005; Gabarrón-Galeote et al., 2013; Smith et al., 2015). It is well known that vegetation  
78 plays an important role ~~in controlling soil genesis and degradation in fragile ecosystems such as~~ estuarine, desert and sandy  
79 lands (Berendse et al., 2015; Cerdà 1998; Miao et al., 2014). ~~Moreover, vegetation functional traits (e.g., morphology and~~  
80 ~~establishment) in response to environmental stress (e.g., nutrient deficiency, water deficit, high irradiance, extreme~~

删除的内容: acclimated

删除的内容: common

删除的内容: woodland

删除的内容: is

删除的内容: accretion

删除的内容: s

删除的内容: l

删除的内容: .

删除的内容: s

删除的内容: , especially

删除的内容: The e

删除的内容: s

删除的内容: to

删除的内容: primary presented

删除的内容: land

删除的内容: the

删除的内容: the

删除的内容: (eg.

删除的内容: )

删除的内容: And their survival and growth is always restricted by barren and harsh environments.

103 temperatures) might be important adaptive life history adaptive strategy (Miner et al., 2005; Wang et al., 2014). Plants  
104 usually have to face a trade-off between survival and growth in response to environmental changes by regulating their  
105 phenotypic plasticity (e.g., biomass allocation, relative growth rate) and/or physiological traits (e.g., antioxidant enzyme  
106 activities, membrane permeability, contents of osmotic substance) (Li et al., 2015; Qu et al., 2012; Tian et al., 2015; Wu et al.,  
107 2013).  
108 In sandy ecosystems, instability of the soil surface is one of the most ~~damaging~~ factors ~~to biological activity~~. ~~Furthermore, a~~  
109 sparse vegetation cover, ~~and a~~ loose soil texture ~~are~~, highly susceptible to sand movements (Liu and Guo, 2005; Yan et al.,  
110 2005). Sand movement, the most direct ~~evidence~~ caused by land degradation, is regarded as a selective force, ~~determining~~  
111 colonization, ~~establishment~~ ~~and establishment of~~ vegetation (Maun, 1994; Maun and Lapierre, 1986). Plants might  
112 respond differently to, ~~various~~ degrees of sand burial, and evolve different regenerative adaptations ~~during~~ the periods of soil  
113 seed bank formation, seed germination, and ~~seedling~~ emergence and development (Li et al., 2014; Qian et al., 2015; Tang et  
114 al., 2016).  
115 As an indigenous tree species, *Ulmus pumila* var. *sabolusa* (sandy elm) has been widely distributed in the leeward slope of  
116 fixed and semi-fixed sand dunes and became the main component of sparse woodlands of the Horqin Sandy Land (Jiang et  
117 al., 2013; Tang et al., 2014; Tang et al., 2013). Since prehistoric times, it has been closely relate to human life, providing  
118 hardwood for farming tools and furniture, fuel for nomad, and fodder from its tender leaves, young fruits and edible  
119 bark (Ma, 1989; Schlütz et al., 2008). In addition, the sparse-elm woodlands, not only offered shelter for wildlife and  
120 domestic animals and a suitable environment for psammophytes; but also protected soil from wind erosion and burial.

删除的内容: However, compared with plant production and ecological function for humans, less attention was drawn to the interactions of soil and plants during the long-term evolution and succession processes under relatively stressful and variable conditions (Foley et al., 2011; Zhao et al., 2004; Zhou et al., 2006).

删除的内容: destructive

删除的内容: and

删除的内容: age

删除的内容: and

删除的内容: is

删除的内容: performance

删除的内容: to

删除的内容: e

删除的内容: distribution and

删除的内容: suffer

删除的内容: from

删除的内容: ying

删除的内容: in

删除的内容: following

144 providing a very important ecological and social function in these arid and semi-arid lands (Yang et al., 2003). Despite  
145 we realize of the effects of sand burial on establishment of sandy elm, much of our comprehension and recognition to date  
146 come from ocular observations at the field rather than from controllable experiments (Maun, 1997). For example, we  
147 observed that even though many plant of non-dormant, dispersed seeds germinated and seedling emergence occurs in the late  
148 spring, few surviving seedlings were detected in the following field surveys in the degraded sparse woodlands. This  
149 phenomenon is hampering its recruitment and will have negative effects on future community structure of these woodland  
150 ecosystems.

151 Studies on the effects of sand burial have been widely reported in the field of seedlings survival (Belcher, 1977; Cheplick  
152 and Grandstaff, 1997; Harris and Davy, 1987; Li et al., 2015; Liu et al., 2008; Perumal and Maun, 2006), physiological  
153 characteristics (Shi et al., 2004; Wang et al., 2012; Zhao et al., 2015), and reproductive strategies (Liu et al., 2014; Sun et al.,  
154 2014; Zhao et al., 2007) of coastal marshes and wetlands plants. In general, it appears to be a threshold sand burial depth for  
155 each plant species to maintain vigor and the subsequent sustain growth (Maun, 1997). Below that burial level, plant emergence  
156 and development have been promoted by increasing sand burial depth (Qu et al., 2012; Yang et al., 2007). Once the threshold  
157 have been exceeded, a deterioration of seedling vigor and reduced growth has occur, and even led to seedling death  
158 (Maun, 1997; Maun and Lapierre, 1986). However, no research has been conducted on the effects of continual sand  
159 accumulation on sandy elm seedlings after emergence to date, because of the limited area of sparse elm woodland. So we  
160 investigated the effects of experimental sand burial on seedling survivorship and growth of sandy elm. The main objectives  
161 of this study were: (1) to evaluate the effect of sand burial on seedling survivorship; (2) to access the changes on seedling

- 带格式的: 字体颜色: 文字 1
- 带格式的
- 删除的内容: n increasing number of
- 域代码已更改
- 带格式的
- 域代码已更改
- 带格式的
- 域代码已更改
- 带格式的
- 带格式的
- 删除的内容: on
- 带格式的
- 删除的内容: there ha...t appears to
- 域代码已更改
- 带格式的
- 删除的内容: e
- 域代码已更改
- 带格式的
- 带格式的
- 删除的内容: :...Once
- 域代码已更改
- 带格式的
- 带格式的
- 删除的内容: .
- 带格式的
- 带格式的
- 带格式的
- 带格式的
- 带格式的
- 带格式的
- 带格式的: 字体: 10 磅
- 删除的内容: :...rea of ...parse elm

220 morphological traits and biomass allocation in response to sand burial, and (3) to explain the failure of sandy elm  
221 regeneration, and provide a theoretical basis for achieving a successful recruitment and vegetation establishment on sandy  
222 elm woodlands.

删除的内容: reconstruction

## 224 Materials and methods

### 225 Study site

226 The experiment was conducted at the WuJanaodu Desertification Experimental Station of the Institute of Applied Ecology,  
227 Chinese Academy of Sciences (43.°02.'N,119.°39.'E, 480\_m a.s.l.), located in western Horqin Sandy Land, China (Figure 1).  
228 This site experiences temperate continental climate. Mean annual temperature and precipitation are 7.3°C and 315\_mm,  
229 respectively. Almost 75% of precipitation occurs from June to September during the growing season. Annual average wind  
230 speed is 4.4\_m\_s<sup>-1</sup>; the windy season is from March to June (Liu et al., 2012; Miao et al., 2014). The landscape is  
231 characterized by sparse woodlands, sand dunes and lowland areas. The dominant soils are aerolian soils, and major plant  
232 species include some shrubs (e.g., Salix gordejewii and Caragana microphylla), and perennial and annual herbs (e.g.,  
233 Bassiadasyphylla, Agriophyllum squarrosum) (Cao et al., 2011).

删除的内容: U'

删除的内容: , where

删除的内容: belongs to

删除的内容: during

删除的内容: in

删除的内容: (Figure 1)

删除的内容: .

删除的内容: /s

删除的内容: D

删除的内容: sandy

删除的内容: L

删除的内容: L

删除的内容: L

### 234 Experimental methods

235 In mid-May 2015, sandy elm seeds were first collected from multiple, mature individuals and then mixed altogether. After  
236 careful selection, uniform and intact seeds were chosen and sowed in plastic pots (45\_cm diameter, 30\_cm height). Sandy soil  
237 was taken from nearby woodlands, and it was sieved to remove debris and branches. All seeds were covered by sand to a

252 depth of 0.5-1.0 cm. In a parallel study, we found that that depth was the most suitable promoting the greatest percentage and  
253 speed of seedling emergence for sandy elm (Tang et al., 2016). Holes in the bottom of the pots were covered with nylon  
254 mesh to prevent soil loss, while allowing drainage of water. All pots were watered every three days to keep the soil moist.  
255 Twenty days after sowing, 8 to 12 seedlings emerged; eight similar seedlings were retained in each pot, and the rest were  
256 removed. Mean seedling height (5.4±0.5 cm) was obtained after measuring the height of each seedling in every pot.  
257 Afterwards, seedlings were experimentally buried to either 0 (T0, no burial, control treatment) or 33% (T33; 1.8 cm), 67%  
258 (T67; 3.6 cm), 100% (T100; 5.4 cm) or 133% (T133; 7.2 cm) soil depth of the original overall mean seedling height. For  
259 this purpose, sandy soil was added to the pots according to the different burial depths. Each seedling was kept vertical while  
260 buried. Six replicates were used per treatment, so there was a total of 30 pots in this experiment. Meanwhile, 15 randomly  
261 selected seedlings were harvested to determine the original measurements for growth analysis before sand burial.  
262 Surviving seedlings were counted after 45 days of treatment initiation. They were considered alive when there was fresh  
263 phloem occurred in both stem and roots, and green tissue on leaf blades. Seedling height was first measured from the new  
264 soil surface level to the seedling apex, and then marked immediately. Stem diameter was measured close to the burial surface  
265 using a vernier caliper. In the meantime, 15 randomly selected seedlings were dug out in each treatment; roots were picked  
266 up as intact as possible from the sandy soil. Taproot lengths were measured, and total leaf area was obtained using a Portable  
267 Area Meter (Li-Cor3000A, Lincoln, Nebraska, USA). Finally, plant organs (i.e., leaves, stems and roots) were dried at 80°C  
268 and weighed there after reaching a constant mass for each seedling in the laboratory.

## 269 Calculations

删除的内容: for having

删除的内容: at

删除的内容: at the same time

删除的内容: left

删除的内容: was

删除的内容: With

删除的内容: ere

删除的内容: treatment started of

删除的内容: in case that

删除的内容:

删除的内容: in

删除的内容: Immediately after burial,  
s

删除的内容: M

284 The (1) relative height growth rate (RHGR, mm·cm<sup>-1</sup>·d<sup>-1</sup>), and (2) relative mass growth rate of seedlings (RMGR, mg  
285 ·mg<sup>-1</sup>·d<sup>-1</sup>) were calculated according to the following equations (Walck et al., 1999; Zhao et al., 2007):

286 
$$RHGR = \frac{H_2 - H_1}{H_1(T_2 - T_1)} \quad (1);$$

287 
$$RMGR = \frac{\ln M_2 - \ln M_1}{T_2 - T_1} \quad (2);$$

288 where H<sub>2</sub> and H<sub>1</sub> were seedling heights at the end and beginning (i.e., immediately before sand burial) of the experiment,  
289 respectively; M<sub>2</sub> or M<sub>1</sub> were the total dry biomass of seedlings either after 45 days from study initiation or just before sand  
290 burial, respectively; ln was the natural logarithm, and T<sub>2</sub>-T<sub>1</sub> was time from sand burial (i.e., 45 days).

### 291 *Statistical analysis*

292 All data were tested for normality and homogeneity of variance prior to analysis. Data were log-transformed if necessary  
293 (Sokal and Rohlf 1995). The effects of experimental sand burial on seedling height, RHGR, plant stem diameter, total leaf  
294 area, RMGR, dry biomass and percentage biomass allocation were evaluated by one-way ANOVA. Whenever F tests were  
295 significant, Tukey's test was used to compare treatment means at P<0.05. All statistical analysis used SPSS 21.0 (SPSS Inc.,  
296 Chicago, USA), and drawing was made using Origin Pro 9.0 (Origin Lab Corp, USA).

## 298 **Results**

### 299 *Effects of permanent sand burial on seedling survival*

300 The effect of sand burial depth on seedling survival was significant (F<sub>4,25</sub>=38.339, P<0.001). During the whole study,  
301 seedling survival was 100% on the unburied (T0) and partial burial treatments (T33, T67). Simultaneously, seedling survival

删除的内容: .

删除的内容: .

带格式的: 字体: (默认) Times  
New Roman

带格式的: 字体: (默认) Times  
New Roman

域代码已更改

删除的内容: initiation

带格式的: 字体: (默认) Times  
New Roman

删除的内容: *continual*

删除的内容: <sup>235</sup>

删除的内容: =

删除的内容: 0

309 (84.48±8.8%) was significantly lower in the completely sand burial treatment (T100) than in the control treatment. No  
310 seedling survived after burial depth exceeded the overall mean original height of seedlings (i.e., on T133).

### 311 *Changes of morphological seedling traits in response to sand burial*

312 Seedling height was significantly affected by sand burial depths after 45 days of burial ( $F_{3,56}=139.978$ ,  $P<0.001$ ). The highest  
313 seedling height was observed in the T33 treatment, which was significantly greater than that in the T67 treatment (Figure 2A;  
314  $P<0.05$ ). Height of seedlings in the control treatment was significantly lower than that in the T33 and T67 treatments, but  
315 higher than that in the T100 treatment (i.e.,  $10.66\pm 0.66$  cm; Figure 2A,  $P<0.05$ ).

316 The relative height growth rate of seedlings (RHGR) was significantly affected ( $F_{3,56}=286.877$ ;  $P\leq 0.001$ ) after 45 days  
317 of sand burial (Figure 2B). Highest ( $0.057\pm 0.004$  mm  $\cdot$ cm $^{-1}$ d $^{-1}$ ) and lowest ( $0.023\pm 0.006$  mm  $\cdot$ cm $^{-1}$ d $^{-1}$ ) relative growth rates  
318 for seedling height were shown in the T33 and T100 treatments, respectively (Figure 2B). The pattern of change with burial  
319 depth was similar to that described for seedling height (Figure 2A); values were greater in the control than 100% covered by  
320 sand (Figure 2B;  $P<0.05$ ).

321 After 45 days from initiation of the study, stem diameter ( $F_{3,56}=26.669$ ,  $P\leq 0.001$ ), taproot length ( $F_{3,56}=30.942$ ,  $P<0.001$ ) and  
322 total leaf area ( $F_{3,56}=35.961$ ,  $P<0.001$ ) of seedlings were also affected by sand burial (Figure 3 A, B, C). Stem diameter was  
323 20% greater ( $P<0.05$ ) in the T33 than in the T0 treatment (Figure 3A). However, stem diameters were similar in the control  
324 and T67 treatments (Figure 3A,  $P>0.05$ ). Values in the T100 treatment, nevertheless, were 13.4% lower than those in the  
325 unburied control (Figure 3A). While taproot length was lowest in the control treatment, it was highest in the T67 treatment  
326 (Figure 3B; 35.7% higher than that in the control;  $P<0.05$ ). The total leaf area of seedlings was significantly greater in the

删除的内容: Seedling height and height growth rate .

删除的内容: =

删除的内容: 0

删除的内容: of 22.35cm

删除的内容: 1

删除的内容: of 16.28cm

删除的内容: of

删除的内容:

删除的内容: (

删除的内容: 1

删除的内容: ;

删除的内容: 1

删除的内容: =

删除的内容: 0

删除的内容: of 1.793mm

删除的内容: of stems

删除的内容: The v

删除的内容: of 1.493mm

删除的内容: of 19.39cm,



347 control than in the T67 and T100 treatments (Figure 3C;  $P < 0.05$ ). The lowest total leaf area, however, was found in the T100  
348 treatment (Figure 3C).

### 349 *Effects of sand burial on biomass growth and relative mass growth rate*

350 There were significant differences in total seedling biomass ( $F_{3,56}=129.949$ ,  $P \leq 0.001$ ) and its component organs [e.g., leaves  
351 ( $F_{3,56}=93.965$ ,  $P < 0.001$ ) and roots ( $F_{3,56}=50.474$ ,  $P = 0.002$ )] after the experiment. The only exception was for seedling stem  
352 biomass ( $F_{3,56}=2.017$ ,  $P = 0.122$ ) which was similar in all sand burial treatments (Table 1). Greatest total biomasses were  
353 reached in the T33 ( $369.65 \pm 17.27$  mg) and T67 treatments ( $372.50 \pm 15.74$  mg) (Table 1). Total biomass of seedlings was  
354 significantly lower in T100 treatment than in those treatments (Table 1). Patterns shown for the biomasses of leaves and  
355 roots among treatments were similar for the total biomass of seedlings (Table 1).

356 Significant differences were found in allocation of seedling biomass to leaves ( $F_{3,56}=12.841$ ,  $P < 0.001$ ), stems ( $F_{3,56}=27.579$ ,  
357  $P \leq 0.001$ ) and roots ( $F_{3,56}=7.594$ ,  $P < 0.001$ ). On leaves, percentage biomass allocation was greatest in the T33 and T67  
358 treatment, and lowest in the control and T100 treatments (Table 2). Percentage biomass allocation to stems was greatest in  
359 the T100 treatment ( $24.1 \pm 1.9\%$ ), values on stems was greater in the control than in the T33 and T67 treatments (Table 2).  
360 Finally, percentage biomass allocation to roots showed a slight decreasing trend from the control to T33 and T67 treatments  
361 (Table 2); values determined in the T100 treatment for this organ were significantly lower than in the control and T33  
362 treatment (Table 2).

363 The relative mass growth rate of seedlings was significantly affected by sand burial at the end of experiment ( $F_{3,56}=136.370$ ,  
364  $P < 0.001$ ). Greatest relative mass growth rate values of  $0.031 \pm 0.001$  mg  $\cdot$  mg<sup>-1</sup> day<sup>-1</sup> were shown both in the T33 and T67

删除的内容: of 23.87cm<sup>2</sup>

删除的内容: of 16.89cm<sup>2</sup>

带格式的: 字体: 倾斜

带格式的: 字体: 倾斜

删除的内容: ,

删除的内容: respectively

删除的内容: Figure 4A

删除的内容: While t

删除的内容: of 272.67mg

删除的内容: Figure 4 A

删除的内容: o those shown

删除的内容: Figure 4A

删除的内容: of 20.9%

删除的内容:

删除的内容: Figure 4B

删除的内容:

删除的内容: was similar

删除的内容: in

删除的内容: ,

删除的内容: (

删除的内容: Figure 4B

删除的内容: s

删除的内容: Figure 4B

删除的内容: Seeding relative growth (...)

删除的内容: after

删除的内容: =

删除的内容: 0

删除的内容: .

393 treatments (Figure 4). These values were significantly greater than those found in the control (Figure 4,  $P < 0.05$ ). Lowest  
394 relative mass rates of growth were determined on seedlings grown in the T100 treatment ( $0.026 \pm 0.001 \text{ mg} \cdot \text{mg}^{-1} \text{ day}^{-1}$ ;  
395 Figure 4).

## 397 Discussion

### 398 Seedling survivorship in response to permanent sand burial

399 In sand land regions, seedlings might be buried at different depths between emergence and the end of the windy season, from  
400 late spring to early summer (Chen and Maun, 1999) and this was stimulated in our experiment. After the 45-days partial  
401 burial with sand (to 33% or 67% of their height) did not influence the survival of seedling of sandy elm seedling, as there  
402 was no mortality. These results agreed with studies of He et al. (2008), Liu et al. (2008) and Qu et al. (2012), which reported  
403 that survivorship of *Artemisia halodendron*, *Corispermum macrocarpum* and *Caragana microphylla* was either maintained  
404 or increased by moderate sand burial in Horqin Sandy Land. Survivorship of these shrubs, however, declined among plant  
405 species once their seedlings were covered by sand either equal to or more than 100% of their height, and this was also the  
406 case for our experiment. Survival decreased sharply by a mean of 15.6%, when seedling were completely buried (to 100% of  
407 their height), while deeper sand burial resulted in no survival of sandy elm at all, as seedlings withered and rotted in the  
408 soil. This precise threshold offers a clear primary explanation for the absence of sandy elm seedling after relatively deep  
409 sand burial. Field survey in recent years has showed that serious land degradation and reduction of vegetation cover has  
410 aggravated sand mobility, particularly in the leeward and semi-fixed dunes. Seedlings could successfully complete their

删除的内容: 5

删除的内容: 5

删除的内容: as

删除的内容: ,

删除的内容: just

删除的内容:

删除的内容: (

删除的内容: 5

带格式的: 字体: (默认) Times  
New Roman

删除的内容: continual

删除的内容: by

域代码已更改

带格式的: 字体: (默认) Times  
New Roman

删除的内容: -experiment,  
survivorship remained unchanged  
when seedlings were either unburied or  
exposed to partial [i.e., 1.8 (T33) and  
3.6 (T67) cm soil depth].

删除的内容: by

删除的内容: vigor

删除的内容: varied

删除的内容: height

删除的内容: Whilst the values

删除的内容: significantly

删除的内容: by a mean of

433 periodic recruitments only taking advantage of scarce favorable spatio-temporal chances (Tian et al., 2015; Wu et al., 2013)

434 Maun (1981, 1997) and Disraeli (1984) also indicated that a certain tolerance to partial sand burial was an effective strategy

435 for survival and subsequent establishment of seedlings in sandy environments. Most seedlings of the grass *Distichlis spicata*

436 died when completely covered by sand in North America (Brown, 1997; Li et al., 2015), while some *Artemisia squarrosus*

437 seedlings still remained alive even though sand burial depths reached 266% of the initial seedling height in the Horqin Sandy

438 Land (Li et al. 2015). Thus, compared with other species, seedling of sandy elm showed moderate resistance to sand burial.

439 Harris and Davy (1987) and Perumal and Maun (2006) suggested that plant energy exhaustion and suppression of

440 photosynthesis were implicated in the severely reduced intense radiation and high temperature to some extent. Seedlings of

441 sandy elm have adapted to extreme conditions and previous research has confirmed that sandy elm had a higher transpiration

442 rate and stomatal conductance with lower photosynthesis water-use efficiency and less sensitivity to high temperature and

443 irradiance, compared with other native tree species such as *Malus baccata*, *Prunus padus* and *Pinus sylvestris*, especially in

444 the midday (Park et al., 2012).

#### 445 *Effects of sand burial on seedling morphological traits*

446 Sand burial modifies the environment of living plants, forming new microhabitat available for seedling (Disraeli, 1984;

447 Sun et al., 2014). Plants would be expected to adjust their morphological performances and developments to maximize

448 photosynthetic efficiency and sustain survival (Wang et al., 2014). Our results demonstrated that various seedling

449 morphological traits (i.e., height; stem diameter; taproot length; total leaf area; dry biomass; partitioning of biomass to shoots

450 and roots; RHGR and RMGR ) were increased by partial butial, especially at T33. Thus seedling height of sandy elm was

- 域代码已更改
- 域代码已更改
- 域代码已更改
- 删除的内容: given completely covered the whole, original seedling height [i.e., 5.4cm soil depth (T100)].
- 删除的内容: of
- 删除的内容: determining the
- 删除的内容: While sand burial exceeded 33% of the original seedling height [i.e., 7.2cm soil depth (T133)], there was no seedling survival, only withered and rotted.(Tian et al., 2015; Wu et al., 2013)Harris and Davy (1987)
- 域代码已更改
- 带格式的
- 带格式的
- 删除的内容: . While
- 删除的内容: .
- 删除的内容: still
- 带格式的
- 域代码已更改
- 删除的内容: Compared with other
- 带格式的
- 域代码已更改
- 删除的内容: can
- 删除的内容: alter
- 删除的内容: biological (e.g., the
- 删除的内容: which influence
- 域代码已更改
- 域代码已更改
- 域代码已更改
- 域代码已更改
- 域代码已更改

494 greater ~~in the partially buried than in the unburied and completely buried treatments, which~~ indicated that partial sand burial  
 495 stimulated stem elongation. This ~~might~~ be explained ~~by the feat that~~ the processes of growth and elongation, ~~benefiting from~~  
 496 ~~improved~~ water ~~maintenance~~ and nutrient uptake in ~~these~~ arid and semi-arid regions (Li et al., 2015). ~~In Horgin Sandy Land,~~  
 497 ~~dry sandy layer was reported in the first 5 cm from soil surface level in semi-fixed dunes. This suggests that suitable sand~~  
 498 ~~burial depth could be beneficial in reducing soil temperature and keep moisture for root uptake, which are critical to~~  
 499 ~~seedlings survival and resource capturing~~ (Niu et al., 2015). ~~Our finding was~~ also consistent with previous research reported  
 500 ~~from~~ Disraeli (1984), ~~who reported~~ that partial burial stimulated growth of *Ammophila* ~~by~~ *eviligulata* in coastal dunes of  
 501 northeastern North America. ~~Belcher (1977) also determind~~ that seedling heights of *Rosa rugosa* ~~was~~ higher in the partial  
 502 than in the unburied and ~~completely~~ continuous sand burial treatments in ~~the~~ desert.  
 503 Seedling height growth rate was a critical parameter to determine the speed of growth. The greater RHGR of seedlings in the  
 504 partial (T33 and T67) than in the unburied and completely bury~~ied~~ treatments (T100) was an indication that partial burial did  
 505 contribute to ~~a greater~~ seedling height after a 45-day-growth period via accelerating the speed of growth in height.  
 506 Nevertheless, the greatest seedling growth in height in the T33 treatment came from its greatest RHGR ~~in this~~ than any other  
 507 treatments. ~~Liu et al. (2008) and Miao et al. (2012) also found that shallow soil~~ burial depths could promote the relative  
 508 growth rates in height ~~on~~ *Salix gordejewii*, *Artemisia wudanica* and *Artemisia*, ~~halodendron~~. However, ~~there is not universally~~  
 509 ~~true as~~ some species(e.g., *Artemisi*, ~~gmelinii~~) ~~have~~ decreased their growth rates as a result of sand burial (Liu et al., 2008).  
 510 These findings confirmed that ~~the phenotypic response to the degree of sand burial might be species-specific.~~  
 511 Compared with the unburied treatment, partial burial treatments fostered increments in stem diameter and taproot length. Sun

- 删除的内容: at the intermediate(i...
- 删除的内容: ed
- 删除的内容: acceleration could
- 删除的内容: by the fact that
- 删除的内容: ed
- 域代码已更改
- 带格式的
- 域代码已更改
- 带格式的
- 删除的内容: This observation
- 删除的内容: is
- 删除的内容: by
- 删除的内容: B
- 删除的内容:
- 删除的内容: and
- 删除的内容: were
- 删除的内容: partial
- 删除的内容: When seedlings
- 带格式的
- 删除的内容: ing
- 删除的内容: The same phenom...
- 带格式的
- 带格式的
- 删除的内容: who
- 删除的内容: of
- 删除的内容: .
- 删除的内容: .
- 删除的内容: have
- 域代码已更改
- 域代码已更改

553 et al. (2014a) also showed that seedling diameter and taproot length of *Suaeda salsa* were increased by a partial burial  
 554 treatment in the coastal marches of the Yellow River estuary, China. Caldwell et al. (1998) found that increases in taproot  
 555 length were conducive to a greater nutrient and water uptake from deeper soil depths. Total leaf area, however, was either  
 556 similar or lower in the partial burial than in the unburied treatment. This was in agreement with the results of Liu and Guo  
 557 (2005), who noted that increasing depth of sand burial decreased the total leaf area of *Caragana intermedia*.  
 558 Changes of biomass allocation and relative mass growth rate, which are involved in successful seedling recruitment, have  
 559 been regarded as the results of variations in plant adaptive strategies in response to environmental changes. (Wu et al., 2013).  
 560 Appropriate resource allocation is essential for plant establishment and growth (Bazzaz, 1997). Also, plants may shift  
 561 resource allocation to minimize the effects of external environmental changes (Maun, 1997; Ni et al., 2015). Numerous  
 562 findings, especially those on sandy environments, have reported that plants could withstand episodes sand burial by changing  
 563 biomass allocation. Some species (e.g. *Artemisia ordosia*, *Elymus farctus*) may transfer biomass from underground to leaf and  
 564 stem organs (Brown, 1997; Li et al., 2010), while others (e.g., *Caragana microphylla*, *Nitraria sphaerocarpa*) have either  
 565 maintained or increased biomass allocation to roots (He et al., 2008; Sykes and Wilson, 1990). In our experiment, it was  
 566 somewhat surprising that no differences were observed in the dry biomass of seedling stems among all sand burial treatments.  
 567 However, seedlings showed an increased stem diameter in the T33 sand burial treatment; similar to results of Zhao et  
 568 al.(2015), this was most likely because of fresh stem had a greater water content in the T33 than in the other treatments.  
 569 Additionally, partial burial treatments produced greater dry biomass for leaves, roots and the whole seedlings in comparison  
 570 with unburied and completely sand burial treatments. Previous studies also determined that 67% burial of seedlings of the

- 删除的内容: Even more, water and nutrients obtained from deep depths by dicots species could be released at shallower soil depths if soil is drier than plant tissues at those depths ...
- 删除的内容: obtained by
- 域代码已更改
- 域代码已更改
- 删除的内容: n a
- 域代码已更改
- 域代码已更改
- 域代码已更改
- 域代码已更改
- 域代码已更改
- 删除的内容: living in
- 删除的内容: various depths
- 删除的内容: of
- 删除的内容: would
- 域代码已更改
- 域代码已更改
- 域代码已更改
- 域代码已更改
- 域代码已更改
- 域代码已更改
- 删除的内容: in the dry biomass of ...
- 删除的内容: as
- 删除的内容: even though
- 删除的内容: , that was probably due ...
- 删除的内容: P
- 删除的内容: determined a
- 删除的内容: than values shown for ...
- 删除的内容: These results were ...
- 删除的内容: showed

611 shrub *Caragana intermedia* determined a greater biomass allocation to leaves and stems ~~than to~~ roots, compared with values  
 612 in the unburied control (Xu et al., 2013). Meanwhile, there was a trend for an increasing aboveground (leaf + stem), and a  
 613 decreasing belowground allocation with increasing burial depth ~~for sandy elm seedlings~~. Nearly 50% of the total seedling  
 614 biomass corresponded to leaves. ~~This indicated sufficient leaves are necessary on sandy elm to sustain~~ photosynthesis and  
 615 maintain evapotranspiration ~~after exposure to high temperature and intense irradiance environments during~~ the growing  
 616 season (Dulamsuren et al., 2009; Li et al., 2003; Park et al., 2012). ~~The relatively investment in root was slight decreased,~~  
 617 ~~which indicated that, on one hand, greater soil moisture availability weakened the dependence on root function, and on the~~  
 618 ~~other hand, the plant's need to divert biomass aboveground for light interception and net assimilation rate~~ (Maun, 1994; Sun  
 619 et al., 2010; Wang et al., 2014).

620 Relative mass growth rates measure the mean efficiency rate ~~for~~ producing new biomass (Walck et al., 1999). Dalling and  
 621 Hubbell (2002) ~~showed~~ that seedling growth rate ~~was a better determinant of~~ successful seedling establishment ~~than biomass~~.  
 622 In our experiment, relative mass growth rates were higher in the partial than in the other treatments, indicating that moderate  
 623 sand burials ~~were~~ beneficial for ~~a rapid biomass increase~~. However, all mass relative growth rates were small compared with  
 624 those of other plant species (e.g., *Artemisia wudanica*, *Solidago shortii* and *Solidago altissima*) in the same area. ~~This~~  
 625 suggests that ~~the relative lower biomass accumulation on sandy elm seedlings during the first growing season places these~~  
 626 ~~seedlings at a disadvantage when considering soil resource competition and coexistence with other species~~ (Brown, 1997;  
 627 Liu et al., 2014; Wu et al., 2013). ~~Reduced dry matter accumulation could also have contributed to increased mortality.~~  
 628 ~~Although there were striking effects on biomass accumulation and allocation reflecting~~ the plasticity of various

删除的内容: , and a lower one to

带格式的: 字体: (默认) Times  
New Roman

域代码已更改

删除的内容: , ...ufficient leaves are...

带格式的: 字体: (默认) Times  
New Roman

域代码已更改

带格式的: 字体: (默认) Times  
New Roman

带格式的: 字体: (默认) Times  
New Roman

域代码已更改

带格式的: 字体: (默认) Times  
New Roman

带格式的: 字体: (默认) Times  
New Roman

带格式的: 字体: (默认) Times  
New Roman

删除的内容: of

域代码已更改

带格式的: 字体: (默认) Times  
New Roman

删除的内容: found...that seedling...

域代码已更改

带格式的: 字体: (默认) Times  
New Roman

带格式的: 字体: (默认) Times  
New Roman

带格式的: 字体: (默认) Times  
New Roman

删除的内容: .

658 morphological traits. Partial sand burial treatments did not change the survivorship, and these treatments facilitate individual  
659 seedling growth and population regeneration through phenotypic plasticity or various morphological traits. Our study,  
660 however, was conducted in pots. We have to recognize it has limitations in comparison to field studies. Under natural  
661 rangeland conditions, some factors (e.g., abrasion of plant tissues by sand grains; grazing by herbivores and granivores)  
662 might reduce or eliminate some of the positive effects of the partial burial treatments (Dulamsuren et al., 2009; Jeffrey et al.,  
663 2009). Furthermore, we found evidence of allometry of each plant proportion with increasing seedling age in our experiment.  
664 Therefore, more comprehensive studies on physiological and biochemical mechanisms involved on sandy elm seedling  
665 survivorship and performance under field, sand burial conditions at different growth stage in future research.

## 666 **Conclusion**

667 Sand burial affected seedling survivorship, growth and biomass allocation of *Ulmus pumila* var. *sabulosa* through phenotypic  
668 plasticity of morphological traits. Seedlings of sandy elm showed adaptive responses to moderate sand burial, consistent with  
669 its evolution in the sandy environment. Partial sand burial treatment did not influence seedling survivorship, but complete  
670 sand burial significantly increased mortality. Compared with the unburied treatment, seedling height, relative height growth  
671 rates, taproot length, total biomass and relative mass growth rates were stimulated by partial burial with sand. At the same  
672 time, percentage biomass allocation of seedlings was changed, diverting more biomass to aboveground organs (e.g., leaf and  
673 stem) to sustain normal photosynthesis and evapo-transpiration. Complete sand burial after seedling emergence, however,  
674 inhibited their growth, and even resulted in seedling death. Consequently, burial depths should be controlled by making  
675 enclosures and increasing vegetation coverage to facilitate regeneration or re-establishment of sandy elm. The observed

删除的内容: , were critical in determining the response, and survivorship and development of sandy elm seedlings in sandy environments

删除的内容: H

删除的内容: this burial study was ...

删除的内容: ,

删除的内容: naw

域代码已更改

带格式的 ...

带格式的 ...

删除的内容: which are involved in ...

带格式的 ...

删除的内容: morphological traits,

删除的内容: production and

带格式的: 字体: 非倾斜

删除的内容: S

删除的内容: a certain resistance to ...

删除的内容: because of

删除的内容: sand

删除的内容:

删除的内容: ; these shifted

删除的内容:

删除的内容: -

删除的内容: in response to the sand ...

删除的内容: could

删除的内容: ;

删除的内容: this is why this

删除的内容: .

711 variation in all parameters ~~has defined the tolerance of *Ulmus pumila* var. *sabulosa* to sandy environments and its capacity to~~  
712 ~~acclimate them. Hence our research provides a theoretical support for recruitment in sandy sparse elm woodlands.~~

713

#### 714 Acknowledgements

715 This study was supported by National Natural Science Foundation of China (31370706) and the Wujanaodu Desertification  
716 Experimental Station of the Institute of Applied Ecology, Chinese Academy of Sciences. We thank Yongming Luo ,Xuehua  
717 Li, Quanlai Zhou, Hongmei Wang, Meiyu Jia, Ya Liu and Xu Han for assistance during the experiment. Thanks Anthony J.  
718 Davy from University of East Anglia for guiding of statistical analysis ~~and language polishing for the original manuscript.~~

719

720

721

#### 722 References

- 723 Bazzaz, F. A.: Allocation of Resources in Plants: State of the Science and Critical Questions. In: Plant Resource Allocation,  
724 Academic Press, San Diego, 1997.
- 725 Belcher, C. R.: Effect of sand cover on the survival and vigor of *Rosa rugosa* Thunb, Int J Biometeorol, 21, 276-280, 1977.
- 726 Bellamy, P. H., Loveland, P. J., Bradley, R. I., Lark, R. M., and Kirk, G. J. D.: Carbon losses from all soils across England  
727 and Wales 1978-2003, Nature, 437, 245-248, 2005.
- 728 Berendse, F., van Ruijven, J., Jongejans, E., and Keesstra, S.: Loss of Plant Species Diversity Reduces Soil Erosion  
729 Resistance, Ecosystems, 18, 881-888, 2015.
- 730 Brevik, E. C., Cerdà A., Mataix-Solera, J., Pereg, L., Quinton, J. N., Six, J., and Van Oost, K.: The interdisciplinary nature  
731 of SOIL, SOIL, 1, 117-129, 2015.
- 732 Brown, J. F.: Effects of Experimental Burial on Survival, Growth, and Resource Allocation of Three Species of Dune Plants,  
733 Journal of Ecology, 85, 151-158, 1997.
- 734 Cao, C.Y., Jiang, D.M., Teng, X.H., Jiang, Y., Liang, W.J., and Cui, Z.B.: Soil chemical and microbiological properties along  
735 a chronosequence of *Caragana microphylla* Lam. plantations in the Horqin sandy land of Northeast China, Applied Soil  
736 Ecology, 40, 78-85, 2008.
- 737 Cao, C.Y., Jiang, S.Y., Zhang, Y., Zhang, F.X., and Han, X.S.: Spatial variability of soil nutrients and microbiological  
738 properties after the establishment of leguminous shrub *Caragana microphylla* Lam. plantation on sand dune in the  
739 Horqin Sandy Land of Northeast China, Ecological Engineering, 37, 1467-1475, 2011.
- 740 Cerdà A.: The influence of aspect and vegetation on seasonal changes in erosion under rainfall simulation on a clay soil in  
741 Spain, Canadian Journal of Soil Science, 78, 321-330, 1998.
- 742 Chen, H. and Maun, M. A.: Effects of sand burial depth on seed germination and seedling emergence of *Cirsium pitcheri*,  
743 Plant Ecology, 140, 53-60, 1999.

删除的内容: indicated

删除的内容: that

删除的内容: could tolerate partial  
sand burial, and

带格式的: 字体: 非倾斜

删除的内容: that it could

删除的内容: e

删除的内容: to sandy environments

删除的内容: U'

删除的内容: in the experiment

带格式的: 缩进: 左侧: 0 厘米



- 753 Cheplick, G. P. and Grandstaff, K.: Effects of sand burial on purple sandgrass (*Triplasis purpurea*): the significance of seed  
754 heteromorphism, *Plant Ecology*, 133, 79-89, 1997.
- 755 Disraeli, D. J.: The Effect of Sand Deposits on the Growth and Morphology of *Ammophila Breviligulata*, *Journal of Ecology*,  
756 72, 145-154, 1984.
- 757 Dulamsuren, C., Hauck, M., Nyambayar, S., Bader, M., Osokhjargal, D., Oyungerel, S., and Leuschner, C.: Performance of  
758 Siberian elm (*Ulmus pumila*) on steppe slopes of the northern Mongolian mountain taiga: Drought stress and herbivory  
759 in mature trees, *Environmental and Experimental Botany*, 66, 18-24, 2009.
- 760 Foley, J. A., DeFries, R., Asner, G. P., Barford, C., Bonan, G., Carpenter, S. R., Chapin, F. S., Coe, M. T., Daily, G. C., Gibbs,  
761 H. K., Helkowski, J. H., Holloway, T., Howard, E. A., Kucharik, C. J., Monfreda, C., Patz, J. A., Prentice, I. C.,  
762 Ramankutty, N., and Snyder, P. K.: Global Consequences of Land Use, *Science*, 309, 570-574, 2005.
- 763 Gabarrón-Galeote, M. A., Martínez-Murillo, J. F., Quesada, M. A., and Ruiz-Sinoga, J. D.: Seasonal changes in the soil  
764 hydrological and erosive response depending on aspect, vegetation type and soil water repellency in different  
765 Mediterranean microenvironments, *Solid Earth*, 4, 497-509, 2013.
- 766 Harris, D. and Davy, A. J.: Seedling Growth in *Elymus farctus* after Episodes of Burial with Sand, *Annals of botany*, 60,  
767 587-593, 1987.
- 768 He, Y.H., Zhao, H.L., Zhao, X.Y., and Liu, X.P.: Effects of different sand burial depths on growth and biomass allocation in  
769 *Caragana microphylla* seedlings, *Arid Land Geography*, 31, 701-706, 2008.
- 770 Jeffrey, B., Bobbie, M. M., Johnj, B., Dennisc, G., Robertj, L., and Jhonathane, E.: Sand Abrasion Injury and Biomass  
771 Partitioning in Cotton Seedlings, *Agronomy Journal*, 101, 1297-1303, 2009.
- 772 Jiang, D.M., Liu, Z.M., Cao, C.Y., Kou, Z.W., and Wang, R.Y.: Desertification and Ecological Restoration of Keerqin Sandy  
773 Land, China Environmental Science Press, Beijing, 2003.
- 774 Jiang, D.M., Tang, Y., and Busso, C. A.: Effects of vegetation cover on recruitment of *Ulmus pumila* L. in Horqin Sandy  
775 Land, northeastern China, *Journal of Arid Land*, 6, 343-351, 2013.
- 776 Li, J., Qu, H., Zhao, H.L., Zhou, R.L., Yun, J.Y., and Pan, C.C.: Growth and physiological responses of *Agriophyllum*  
777 *squarrosus* to sand burial stress, *Journal of Arid Land*, 7, 94-100, 2015.
- 778 Li, S.L., Weger, M. A., Zuidema, P., Yu, F.-H., and Dong, M.: Seedlings of the semi-shrub *Artemisia ordosica* are resistant  
779 to moderate wind denudation and sand burial in Mu Us sandland, China, *Trees*, 24, 515-521, 2010.
- 780 Li, X.H., Jiang, D.M., Zhou, Q.L., and Oshida, T.: Soil seed bank characteristics beneath an age sequence of *Caragana*  
781 *microphylla* shrubs in the Horqin Sandy Land region of northeastern China, *Land Degradation & Development*, 25,  
782 236-243, 2014.
- 783 Li, Y. G., Jiang, G. M., Niu, S. L., Liu, M. Z., Peng, Y., Yu, S. L., and Gao, L. M.: Gas Exchange and Water Use Efficiency  
784 of Three Native Tree Species in Hunshandak Sandland of China, *Photosynthetica*, 41, 227-232, 2003.
- 785 Liu, B., Liu, Z.M., and Guan, D.X.: Seedling growth variation in response to sand burial in four *Artemisia* species from  
786 different habitats in the semi-arid dune field, *Trees*, 22, 41-47, 2008.
- 787 Liu, B., Liu, Z.M., Lü X.T., Maestre, F. T., and Wang, L.X.: Sand burial compensates for the negative effects of erosion on  
788 the dune-building shrub *Artemisia wudanica*, *Plant and Soil*, 374, 263-273, 2014.
- 789 Liu, H. and Guo, K.: The impacts of sand burial on seedling development of *Caragana intermedia*, *Acta Ecologica Sinica*, 25,

带格式的: 字体: 非倾斜

带格式的: 字体: 非倾斜

带格式的: 字体: 非倾斜

790 2550-2555, 2005.

791 Liu, Z.M., Zhu, J.L., and Deng, X.: Arrival vs. retention of seeds in bare patches in the semi-arid desertified grassland of  
792 Inner Mongolia, northeastern China, *Ecological Engineering*, 49, 153-159, 2012.

793 Ma, C. G.: A Provenance Test of White Elm (*Ulmus-Pumila* L) in China, *Silvae Genet*, 38, 37-44, 1989.

794 Maun, M. A.: Adaptations enhancing survival and establishment of seedlings on coastal dune systems, *Vegetatio*, 111, 59-70,  
795 1994.

796 Maun, M. A.: Adaptations of plants to burial in coastal sand dunes, *Canadian Journal of Botany-Revue Canadienne De*  
797 *Botanique*, 76, 713-738, 1997.

798 Maun, M. A. and Lapierre, J.: Effects of Burial by Sand on Seed Germination and Seedling Emergence of Four Dune Species,  
799 *American Journal of Botany*, 73, 450-455, 1986.

800 Miao, R.H., Jiang, D.M., Musa, A., Zhou, Q.L., Guo, M.X., and Wang, Y.C.: Effectiveness of shrub planting and grazing  
801 exclusion on degraded sandy grassland restoration in Horqin sandy land in Inner Mongolia, *Ecological Engineering*, 74,  
802 164-173, 2014.

803 Miner, B. G., Sultan, S. E., Morgan, S. G., Padilla, D. K., and Relyea, R. A.: Ecological consequences of phenotypic  
804 plasticity, *Trends in Ecology & Evolution*, 20, 685-692, 2005.

805 Ni, J., Luo, D. H., Xia, J., Zhang, Z. H., and Hu, G.: Vegetation in karst terrain of southwestern China allocates more  
806 biomass to roots, *Solid Earth*, 6, 799-810, 2015.

807 Niu, C. Y., Musa, A., and Liu, Y.: Analysis of soil moisture condition under different land uses in the arid region of Horqin  
808 sandy land, northern China, *Solid Earth*, 6, 1157-1167, 2015.

809 Park, Y. D., Lee, D. K., Batkhuu, N. O., Tsogtbaatar, J., Combalicer, M. S., Go, E., Park, and Su, Y. W.: Woody Species  
810 Variations in Biomass Allocation, Photosynthetic WUE and Carbon Isotope Composition under Natural Drought  
811 Condition in Mongolia, *Journal of Environmental Science & Management*, 2012. 29-37, 2012.

812 Perumal, V. J. and Maun, M. A.: Ecophysiological response of dune species to experimental burial under field and controlled  
813 conditions, *Plant Ecology*, 184, 89-104, 2006.

814 Qian, J.Q., Liu, Z.M., Hatier, J. H. B., and Liu, B.: The Vertical Distribution of Soil Seed Bank and Its Restoration  
815 Implication in an Active Sand Dune of Northeastern Inner Mongolia, China, *Land Degradation & Development*, 2015.  
816 2015.

817 Qiu, S.W.: Study on the formation and evolution of Horqin Sandy Land, *Scientia Geographica Sinica*, 9, 317-328, 1989.

818 Qu, H., Zhao, H.L., Zhou, R.L., Zuo, X.A., Luo, Y., Wang, J., and Barron, J. O.: Effects of sand burial on the survival and  
819 physiology of three psammophytes of Northern China, *African Journal of Biotechnology*, 11, 4518-4529, 2012.

820 Schlütz, F., Dulamsuren, C., Wieckowska, M., Mühlenberg, M., and Hauck, M.: Late Holocene vegetation history suggests  
821 natural origin of steppes in the northern Mongolian mountain taiga, *Palaeogeography, Palaeoclimatology, Palaeoecology*,  
822 261, 203-217, 2008.

823 Shi, L., Zhang, Z. J., Zhang, C. Y., and Zhang, J. Z.: Effects of sand burial on survival, growth, gas exchange and biomass  
824 allocation of *Ulmus pumila* seedlings in the Hunshandak Sandland, China, *Annals of botany*, 94, 553-560, 2004.

825 Smith, P., Cotrufo, M. F., Rumpel, C., Paustian, K., Kuikman, P. J., Elliott, J. A., McDowell, R., Griffiths, R. I., Asakawa, S.,  
826 Bustamante, M., House, J. I., Sobocká J., Harper, R., Pan, G., West, P. C., Gerber, J. S., Clark, J. M., Adhya, T., Scholes,

827 R. J., and Scholes, M. C.: Biogeochemical cycles and biodiversity as key drivers of ecosystem services provided by soils,  
828 SOIL, 1, 665-685, 2015.

829 Sun, Z.G., Mou, X.J., Lin, G.H., Wang, L.L., Song, H.L., and Jiang, H.: Effects of sediment burial disturbance on seedling  
830 survival and growth of *Suaeda salsa* in the tidal wetland of the Yellow River estuary, Plant and Soil, 337, 457-468, 2010.

831 Sun, Z.G., Song, H.L., Sun, W.G., and Sun, J.K.: Effects of continual burial by sediment on morphological traits and dry  
832 mass allocation of *Suaeda salsa* seedlings in the Yellow River estuary: An experimental study, Ecological Engineering,  
833 68, 176-183, 2014.

834 Sykes, M. T. and Wilson, J. B.: An experimental investigation into the response of New Zealand sand dune species to  
835 different depths of burial by sand, Acta Botanica Neerlandica, 39, 171-181, 1990.

836 Tang, J., Busso, C., Jiang, D.M., Wang, Y.C., Wu, D.F., Musa, A., Miao, R.H., and Miao, C.P.: Seed Burial Depth and Soil  
837 Water Content Affect Seedling Emergence and Growth of *Ulmus pumila* var. *sabulosa* in the Horqin Sandy Land,  
838 Sustainability, 8, 68, 2016.

839 Tang, J., Jiang, D.M., and Wang, Y.C.: A review on the process of seed-seedling regeneration of *Ulmus pumila* in sparse  
840 forest grassland, Chinese Journal of Ecology, 33, 1114-1120, 2014.

841 Tang, Y., Jiang, D.M., and Lü, X.T.: Effects of Exclosure Management on Elm (*Ulmus Pumila*) Recruitment in Horqin Sandy  
842 Land, Northeastern China, Arid Land Research and Management, 28, 109-117, 2013.

843 Tian, F.P., Liu, Y., Wu, G.L., and Shi, S.L.: Seedling recruitment of forb species under experimental microhabitats in alpine  
844 grassland, Pakistan Journal of Botany, 47, 2127-2134, 2015.

845 Verheijen, F. G. A., Jones, R. J. A., Rickson, R. J., and Smith, C. J.: Tolerable versus actual soil erosion rates in Europe,  
846 Earth-Science Reviews, 94, 23-38, 2009.

847 Walck, J. L., Baskin, J. M., and Baskin, C. C.: Relative competitive abilities and growth characteristics of a narrowly  
848 endemic and a geographically widespread *Solidago* species (Asteraceae), American Journal of Botany, 86, 820-828,  
849 1999.

850 Wang, D., Zhu, Y. J., Wu, G. L., and Feng, J.: Seedling performance within eight different seed-size alpine forbs under  
851 experimentation with irradiance and nutrient gradients, Pakistan Journal of Botany, 46, 1261-1268, 2014.

852 Wang, J., Zhou, R.L., Zhao, H.L., Zhao, Y., and Hou, Y.: Growth and physiological adaptation of *Messerschmidia sibirica* to  
853 sand burial on coastal sandy, Acta Ecologica Sinica, 32, 4291-4299, 2012.

854 Wang, K.B., Deng, L., Ren, Z.P., Li, J.P., and Shangguan, Z.: Grazing exclusion significantly improves grassland ecosystem  
855 C and N pools in a desert steppe of Northwest China, Catena, 137, 441-448, 2016.

856 Wu, G. L., Feng, J., Shi, Z. H., and Du, G. Z.: Plant seedling performance traits impact on successful recruitment in various  
857 microhabitats for five Alpine *Saussurea* species, Pakistan Journal of Botany, 45, 61-71, 2013.

858 Xu, L., Huber, H., During, H. J., Dong, M., and Anten, N. P. R.: Intraspecific variation of a desert shrub species in  
859 phenotypic plasticity in response to sand burial, New Phytologist, 199, 991-1000, 2013.

860 Yan, Q.L., Liu, Z.M., Zhu, J.J., Luo, Y.M., Wang, H.M., and Jiang, D.: Structure, Pattern and Mechanisms of Formation of  
861 Seed Banks in Sand Dune Systems in Northeastern Inner Mongolia, China, Plant & Soil, 277, 175-184, 2005.

862 Yang, H.L., Cao, Z.P., Dong, M., Ye, Y.Z., and Huang, z.: Effects of sand burying on caryopsis germination and seedling  
863 growth of *Bromus inermis* Leyss, Chinese Journal of Applied Ecology, 18, 2438-2443, 2007.

864 Yang, L.M., Zhou, G.S., Wang, G.H., and Wang, Y.H.: Effect of human activities on soil environment and plant species  
865 diversity of elm sparse woods, *The Journal of Applied Ecology*, 14, 321-325, 2003.

866 Zhang, T.H., Zhao, H.L., Li, S.G., Li, F.R., Shirato, Y., Ohkuro, T., and Taniyama, I.: A comparison of different measures for  
867 stabilizing moving sand dunes in the Horqin Sandy Land of Inner Mongolia, China, *Journal of Arid Environments*, 58,  
868 203-214, 2004.

869 Zhao, H.L., Li, J., Zhou, R.L., Qu, H., Yun, J.Y., and Pan, C.C.: Effects of Sand Burial on Growth Properties of *Pinus*  
870 *sylvestris* var. *mongolica*, *Journal of Desert Research*, 35, 60-65, 2015.

871 Zhao, W. Z., Li, Q. Y., and Fang, H. Y.: Effects of sand burial disturbance on seedling growth of *Nitraria sphaerocarpa*,  
872 *Plant and Soil*, 295, 95-102, 2007.

873  
874  
875  
876  
877  
878  
879  
880  
881  
882  
883  
884  
885  
886  
887  
888  
889  
890  
891  
892  
893  
894  
895  
896  
897  
898  
899  
900

带格式的: 字体: 10 磅  
带格式的: 缩进: 左侧: 0 厘米,  
悬挂缩进: 1.5 字符

901  
902  
903  
904  
905  
906  
907  
908  
909  
910  
911  
912  
913  
914  
915  
916  
917  
918  
919  
920  
921  
922  
923

**Table legends**

**Table. 1** Dry biomass of leaves, stems and roots for seedlings of *Ulmus pumila* var. *sabulosa* exposed to various sand burial treatments during a 45-day-growth period. These treatments included sand burial of seedlings to a depth equivalent to 33 (T33), 67 (T67) or 100% (T100) of the mean seedling height at the initiation of the study. Each histogram is the mean  $\pm$  1 S.E. of n=15. Different letters in a row among seed burial depths are significantly different at P<0.05.

**Table. 2** Percentage biomass allocation to leaves, stems and roots on seedlings of *Ulmus pumila* var. *sabulosa* expose to various sand burial treatments during a 45-day-growth period. These treatments included sand burial of seedlings to a depth equivalent to 33 (T33), 67 (T67) or 100% (T100) of the mean seedling height at the initiation of the study. Each histogram is the mean  $\pm$  1 S.E. of n=15. Different letters above histograms among seed burial depths are significantly different at P<0.05.

**Figure legends**

**Fig. 1** The geographic location of study area in Horqin Sandy Land, China.

**Fig.2** Seedling height and relative growth rate for height (RHGR) of *Ulmus pumila* var. *sabulosa* exposed to various sand burial treatments during a 45-day- growth period. These treatments included sand burial of seedlings to a depth equivalent to 33 (T33), 67 (T67) or 100% (T100) of the mean seedling height at the initiation of the study (see the Material and Methods Section for further details). Each histogram is the mean  $\pm$  1 S.E. of n=15. Different letters above histograms among seed burial depths are significantly different at P<0.05.

**Fig.3.** Stem diameter, taproot length and total leaf area on seedlings of *Ulmus pumila* var. *sabulosa* exposed to various sand burial treatments during a 45-day-growth period. These treatments included sand burial of seedlings to a depth equivalent to 33 (T33), 67 (T67)

- 带格式的: 字体: 10 磅
- 带格式的: 字体: 小五, 检查拼写和语法
- 带格式的: 行距: 1.5 倍行距
- 带格式的: 字体: 小五, 非加粗
- 带格式的: 字体: 小五
- 带格式的: 行距: 1.5 倍行距
- 带格式的: 字体: 小五, 非加粗
- 带格式的: 字体: 非加粗
- 带格式的: 字体: 10 磅
- 带格式的: 字体: 小五, 检查拼写和语法
- 带格式的: 字体: (默认) Times New Roman, 小五, 检查拼写和语法
- 带格式的: 字体: (默认) Times New Roman, 小五, 检查拼写和语法
- 带格式的: 字体: 小五, 检查拼写和语法
- 带格式的: 字体: (默认) Times New Roman, 小五, 检查拼写和语法
- 带格式的: 字体: 小五, 检查拼写和语法
- 带格式的: 字体: (默认) Times New Roman, 小五, 检查拼写和语法
- 带格式的: 字体: 小五, 检查拼写和语法
- 删除的内容: Dynamics in precipitation and temperature (T) from 1980 to 2014 in U'lnaoadu. The solid line shows the average annual ...
- 带格式的: ...
- 带格式的: 字体: 小五, 非倾斜
- 带格式的: 字体: 小五
- 删除的内容: u
- 删除的内容: o
- 带格式的: 字体: 小五, 非加粗
- 带格式的: 字体: 小五
- 带格式的: 字体: 小五, 非倾斜
- 带格式的: 字体: 小五
- 删除的内容: u
- 删除的内容: o

942  
943  
944  
945  
946  
947  
948  
949  
950  
951  
952  
953  
954  
955  
956  
957  
958  
959  
960

or 100% (T100) of the mean seedling height at the initiation of the study. Each histogram is the mean  $\pm$  1 S.E. of n=15. Different letters  
above histograms among seed burial depths are significantly different at P<0.05.  
**Fig.4** Relative mass growth rates (RMGR) on seedlings of *Ulmus pumila* var. *sabulosa* exposed to various sand burial treatments during a 45-day-growth period. These treatments included sand burial of seedlings to a depth equivalent to 33 (T33), 67 (T67) or 100% (T100) of the mean seedling height at the initiation of the study. Each histogram is the mean  $\pm$  1 S.E. of n=15. Different letters above histograms among seed burial depths are significantly different at P<0.05.

- 带格式的：字体：小五，非加粗
- 带格式的：字体：小五
- 删除的内容：.
- Fig.4 Seedling dry biomass and percentage biomass allocation to leaves, stems and roots on seedlings of *Ulmus pumila* var. *sabulosa* exposed to various sand burial treatments during a 45-day-growth period. These treatments included sand burial of seedlings to a depth equivalent to 33 (T33), 67 (T67) or 100% (T100) of the mean seedling height at the initiation of the study. Each histogram is the mean  $\pm$  1 S.E. of n=15. .
- 带格式的：字体：小五，非倾斜
- 带格式的：字体：小五
- 删除的内容：5
- 带格式的：字体：小五
- 删除的内容：u
- 删除的内容：o
- 带格式的：字体：小五，非倾斜
- 带格式的：字体：小五，非加粗
- 带格式的：字体：小五

977

Table 1

| <u>Treatment</u> | <u>Stem</u>  | <u>Root</u>   | <u>Leaf</u>    | <u>Total</u>   |
|------------------|--------------|---------------|----------------|----------------|
|                  | <u>mg</u>    | <u>mg</u>     | <u>mg</u>      | <u>mg</u>      |
| <u>T0</u>        | 66.62 ±3.49a | 91.7 ±7.51b   | 160.63 ±9.15b  | 318.95 ±14.85b |
| <u>T33</u>       | 69.52 ±7.76a | 104.59 ±9.89c | 195.55 ±11.54c | 369.65 ±17.27c |
| <u>T67</u>       | 68.69 ±4.05a | 101.64 ±6.87c | 200.17 ±14.73c | 372.5 ±15.74c  |
| <u>T100</u>      | 65.51 ±3.52a | 69.61 ±9.84a  | 137.55 ±12.43a | 272.67 ±16.42a |

带格式的: 字体: 10 磅

978

979

| <u>Treatment</u> | <u>Stem</u> | <u>Root</u> | <u>Leaf</u> |
|------------------|-------------|-------------|-------------|
|                  | <u>%</u>    | <u>%</u>    | <u>%</u>    |
| <u>T0</u>        | 20.9 ±1.4b  | 28.8 ±1.6b  | 50.3 ±1.4b  |
| <u>T33</u>       | 18.8 ±1.4b  | 28.3 ±1.4b  | 52.9 ±1.6c  |
| <u>T67</u>       | 18.5 ±1.3a  | 27.3 ±1.7ab | 54.2 ±2.4c  |
| <u>T100</u>      | 24.1 ±2.4c  | 25.5 ±2.4c  | 50.4 ±2.4c  |

带格式的: 字体: 10 磅

带格式表格

带格式的: 字体: 10 磅, 非倾斜

带格式的: 字体: 10 磅

带格式的: 字体: 10 磅, 非倾斜

带格式的: 字体: 10 磅

980

981

982

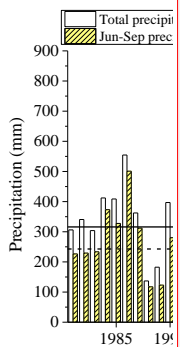

删除的内容:

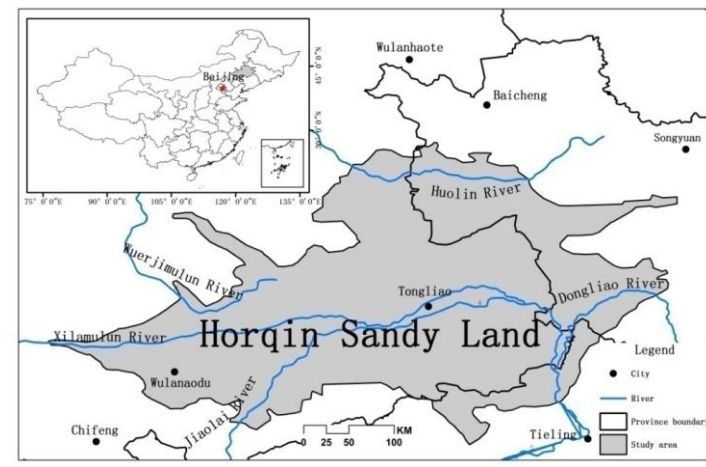

带格式的: 字体: (默认) Times New Roman, (中文) Arial Unicode MS, 10 磅

Figure 1

带格式的: 字体: (默认) Times New Roman, 10 磅

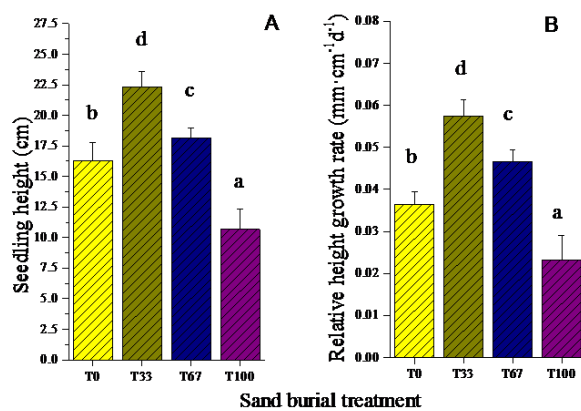

Figure 2

带格式的: 字体: (默认) Times New Roman, 10 磅

984  
985  
986  
987  
988

989  
990



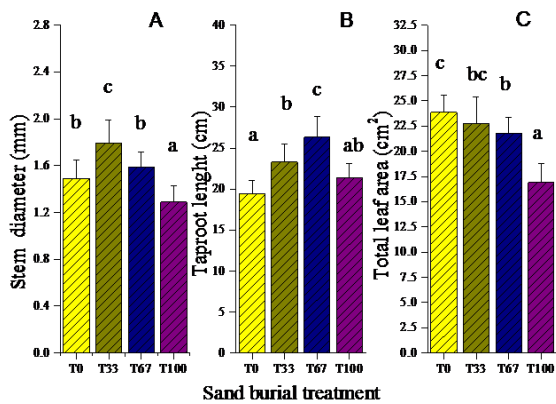

Figure 3

带格式的: 字体: (默认) Times New Roman, 10 磅

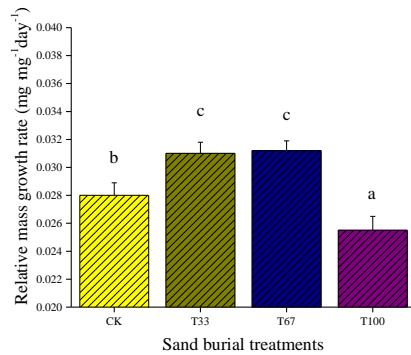

Figure 4

删除的内容:

删除的内容: Figure4 .

带格式的: 字体: (默认) Times New Roman, 10 磅

删除的内容: 5

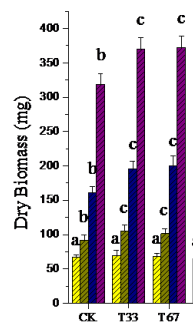

991  
992  
993  
994

995  
996  
997  
998
